# Supplementary material for: Transcriptome analysis of a taxol-producing endophytic fungus Cladosporium cladosporioides MD2
Source: PubMed Central journal article supplement (PMC5859003; doi:10.1186/s13568-018-0567-6), 2018-03-19
Supplement: 13568_2018_567_MOESM1_ESM.pdf [file 13568_2018_567_MOESM1_ESM.pdf]

**Applied Microbiology and Biotechnology** (transfer to AMB Express)

**Transcriptome analysis of a taxol-producing endophytic fungus *Cladosporium cladosporioides* MD2**

Li-Yun Miao<sup>1,2,3+</sup>, Xin-Chun Mo<sup>4+</sup>, Xiao-Yuan Xi<sup>1+</sup>, Lan Zhou<sup>1</sup>, Ge De<sup>1</sup>, You-Sheng Ke<sup>1</sup>, Pan Liu<sup>1</sup>, Fa-Jun Song<sup>1</sup>, Wen-Wen Jin<sup>3\*</sup>, Peng Zhang<sup>1\*</sup>

<sup>1</sup> Hubei Provincial Key Laboratory for Protection and Application of Special Plants in Wuling Area of China, Key Laboratory of State Ethnic Affairs Commission for Biological Technology, College of Life Science, South-Central University for Nationalities, Wuhan 430074, China;

<sup>2</sup> School of Life Science, Wuchang University of Technology, Wuhan 430074, China;

<sup>3</sup> School of Life Science and Technology, Huazhong University of Science and Technology. Wuhan 430074, China;

<sup>4</sup> School of Applied Technology, Lijiang Teacher College. Lijiang, 674100, China

<sup>+</sup> These authors contributed equally to this work.

**Corresponding authors:**

Peng Zhang

College of Life Science, South-Central University for Nationalities, Wuhan 430074, China;

Email: zhangpenghust@126.com;

Telephone and fax numbers: +86 (27) 67842689.

Wen-Wen Jin

School of Life Science and Technology, Huazhong University of Science and Technology. Wuhan 430074, China;

Email: jww@hust.edu.cn;

Telephone and fax numbers: +86 (27) 87792264.

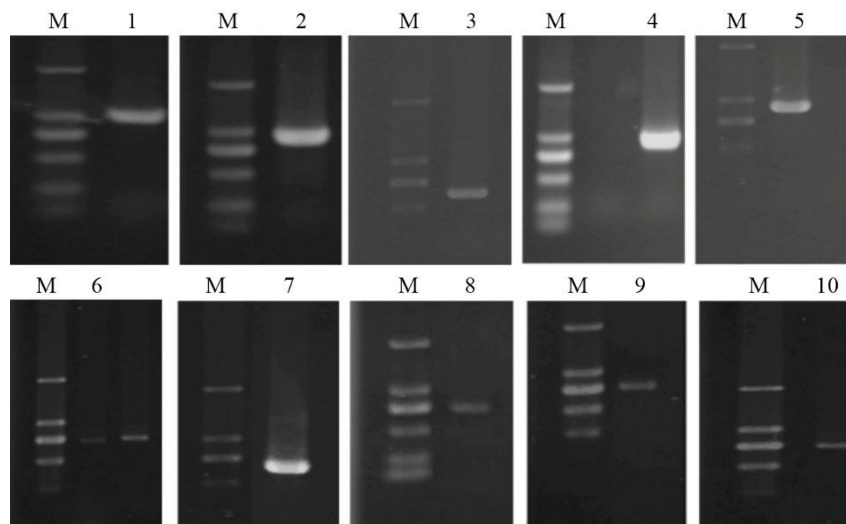

**Fig. S1.** Reverse-transcribed PCR validation of the *C. cladosporioides* MD2 unigenes. Ten of the *C. cladosporioides* MD2 unigenes were randomly selected for reverse-transcribed PCR (RT-PCR) validation. The results showed that these selected unigenes got right amplifications. M: DL2000 marker; lane 1-10 was the amplification products of unigenes of c3348\_g1, c14778\_g1, c2571\_g1, c10254\_g1, c11322\_g1, c6738\_g1, c13171\_g1, c11554\_g1, c13227\_g1 and c13492\_g1, respectively.

**Table S1.** The primers of the ten unigenes for Reverse-Transcribed PCR (RT-PCR) validation.

| Unigene IDs | Primers                                                                                  |
|-------------|------------------------------------------------------------------------------------------|
| c13492_g1   | Forward: 5'- ATGCTGCTCGCTTCTACCCTC -3'<br>Reverse: 5'- TCAGTCCAGGGAACCGGGATGCG -3'       |
| c13227_g1   | Forward: 5'- ATGGCCTTGTTTATCGCAA -3'<br>Reverse: 5'- CTACCTCACAATCACCACCG -3'            |
| c11554_g1   | Forward: 5'- ATGGAAGGCGTGACATAT -3'<br>Reverse: 5'- TCATGACAGCAGGGAGCC -3'               |
| c13171_g1   | Forward: 5'- ATGACTGGCGCGAGAAAAG -3'<br>Reverse: 5'- TCAGTCCGCGAAAGTTCTTG -3'            |
| c3348_g1    | Forward: 5'- ATGCTCGCAAGCATTGCTTTTTCTG -3'<br>Reverse: 5'- TTAAGCAGTCGGATACGGGTAGTTC -3' |
| c14778_g1   | Forward: 5'- ATGCCTTATTTCAACATCTGCG -3'<br>Reverse: 5'- TCACCAGAACACCCCATTGATAG -3'      |
| c2571_g1    | Forward: 5'- ATGTCGCTGTTTGAGCCC -3'<br>Reverse: 5'- TCACTTACCACCGCCAATG -3'              |
| c10254_g1   | Forward: 5'- ATGGCCGGAATGGCAATC -3'<br>Reverse: 5'- CTACAATCTCGCCTTGGG -3'               |
| c11322_g1   | Forward: 5'- ATGCACGCTTTCGCAATCT -3'<br>Reverse: 5'- TCAAGCAGAGCATTTCCTT -3'             |
| c6738_g1    | Forward: 5'- ATGAGTCTGCAGGTGCCCGTC -3'<br>Reverse: 5'- TTACATGATGATCTCGTTTTGTACG -3'     |

**Table S2.** GO annotation of the *C. cladosporioides* MD2 unigenes.

| GO ID (Lev2) | GO Term (Lev2)                                     | GO Term (Lev1)     | Gene Number |
|--------------|----------------------------------------------------|--------------------|-------------|
| GO:0005215   | transporter activity                               | Molecular Function | 726         |
| GO:0030234   | enzyme regulator activity                          | Molecular Function | 105         |
| GO:0098772   | molecular function regulator                       | Molecular Function | 170         |
| GO:0016530   | metallochaperone activity                          | Molecular Function | 4           |
| GO:0003824   | catalytic activity                                 | Molecular Function | 4156        |
| GO:0005198   | structural molecule activity                       | Molecular Function | 245         |
| GO:0016247   | channel regulator activity                         | Molecular Function | 34          |
| GO:0060089   | molecular transducer activity                      | Molecular Function | 167         |
| GO:0005488   | binding                                            | Molecular Function | 4519        |
| GO:0030545   | receptor regulator activity                        | Molecular Function | 9           |
| GO:0016209   | antioxidant activity                               | Molecular Function | 49          |
| GO:0005085   | guanyl-nucleotide exchange factor activity         | Molecular Function | 12          |
| GO:0000988   | protein binding transcription factor activity      | Molecular Function | 118         |
| GO:0001071   | nucleic acid binding transcription factor activity | Molecular Function | 415         |
| GO:0032501   | multicellular organismal process                   | Biological Process | 132         |

|            |                                               |                    |      |
|------------|-----------------------------------------------|--------------------|------|
| GO:0009987 | cellular process                              | Biological Process | 4944 |
| GO:0040007 | growth                                        | Biological Process | 5    |
| GO:0048518 | positive regulation of biological process     | Biological Process | 109  |
| GO:0044699 | single-organism process                       | Biological Process | 4090 |
| GO:0071840 | cellular component organization or biogenesis | Biological Process | 795  |
| GO:0007610 | behavior                                      | Biological Process | 16   |
| GO:0008152 | metabolic process                             | Biological Process | 4861 |
| GO:0048519 | negative regulation of biological process     | Biological Process | 78   |
| GO:0001906 | cell killing                                  | Biological Process | 6    |
| GO:0065007 | biological regulation                         | Biological Process | 1627 |
| GO:0098743 | cell aggregation                              | Biological Process | 1    |
| GO:0032502 | developmental process                         | Biological Process | 96   |
| GO:0050789 | regulation of biological process              | Biological Process | 1496 |
| GO:0022610 | biological adhesion                           | Biological Process | 60   |
| GO:0048511 | rhythmic process                              | Biological Process | 4    |
| GO:0000003 | reproduction                                  | Biological Process | 65   |
| GO:0051704 | multi-organism process                        | Biological Process | 443  |
| GO:0044848 | biological phase                              | Biological Process | 3    |
| GO:0051179 | localization                                  | Biological Process | 1583 |
| GO:0022414 | reproductive process                          | Biological Process | 40   |
| GO:0040011 | locomotion                                    | Biological Process | 82   |
| GO:0023052 | signaling                                     | Biological Process | 574  |
| GO:0050896 | response to stimulus                          | Biological Process | 1037 |
| GO:0002376 | immune system process                         | Biological Process | 41   |
| GO:0031974 | membrane-enclosed lumen                       | Cellular Component | 294  |
| GO:0044422 | organelle part                                | Cellular Component | 898  |
| GO:0044464 | cell part                                     | Cellular Component | 2707 |
| GO:0044420 | extracellular matrix component                | Cellular Component | 14   |
| GO:0005576 | extracellular region                          | Cellular Component | 146  |
| GO:0045202 | synapse                                       | Cellular Component | 4    |
| GO:0044456 | synapse part                                  | Cellular Component | 4    |
| GO:0044425 | membrane part                                 | Cellular Component | 1429 |
| GO:0030054 | cell junction                                 | Cellular Component | 2    |
| GO:0043226 | organelle                                     | Cellular Component | 1870 |
| GO:0009295 | nucleoid                                      | Cellular Component | 1    |
| GO:0044421 | extracellular region part                     | Cellular Component | 144  |
| GO:0019012 | virion                                        | Cellular Component | 239  |
| GO:0032991 | macromolecular complex                        | Cellular Component | 1575 |
| GO:0016020 | membrane                                      | Cellular Component | 1512 |
| GO:0031012 | extracellular matrix                          | Cellular Component | 26   |
| GO:0005623 | cell                                          | Cellular Component | 2707 |
| GO:0044423 | virion part                                   | Cellular Component | 239  |

---

**Table S3.** KEGG classification of the *C. cladosporioides* MD2 unigenes.

| Pathway Hierarchy1             | Pathway Hierarchy2               | KEGG Pathway                                | Pathway ID | Gene Number |
|--------------------------------|----------------------------------|---------------------------------------------|------------|-------------|
| Metabolism                     | Overview                         | Biosynthesis of amino acids                 | ko01230    | 157         |
| Metabolism                     | Overview                         | Carbon metabolism                           | ko01200    | 150         |
| Genetic Information Processing | Translation                      | Ribosome                                    | ko03010    | 104         |
| Genetic Information Processing | Transcription                    | Spliceosome                                 | ko03040    | 97          |
| Metabolism                     | Nucleotide metabolism            | Purine metabolism                           | ko00230    | 79          |
| Metabolism                     | Carbohydrate metabolism          | Starch and sucrose metabolism               | ko00500    | 78          |
| Cellular Processes             | Cell growth and death            | Cell cycle - yeast                          | ko04111    | 78          |
| Genetic Information Processing | Folding, sorting and degradation | Protein processing in endoplasmic reticulum | ko04141    | 74          |
| Cellular Processes             | Transport and catabolism         | Peroxisome                                  | ko04146    | 67          |
| Metabolism                     | Carbohydrate metabolism          | Glycolysis / Gluconeogenesis                | ko00010    | 61          |
| Metabolism                     | Energy metabolism                | Oxidative phosphorylation                   | ko00190    | 59          |
| Metabolism                     | Amino acid metabolism            | Glycine, serine and threonine metabolism    | ko00260    | 59          |
| Genetic Information Processing | Translation                      | RNA transport                               | ko03013    | 59          |
| Cellular Processes             | Cell growth and death            | Meiosis - yeast                             | ko04113    | 59          |
| Metabolism                     | Nucleotide metabolism            | Pyrimidine metabolism                       | ko00240    | 57          |
| Metabolism                     | Carbohydrate metabolism          | Amino sugar and nucleotide sugar metabolism | ko00520    | 56          |
| Cellular Processes             | Transport and catabolism         | Endocytosis                                 | ko04144    | 55          |
| Genetic Information Processing | Folding, sorting and degradation | Ubiquitin mediated proteolysis              | ko04120    | 54          |
| Cellular Processes             | Cell growth and death            | Cell cycle                                  | ko04110    | 53          |
| Metabolism                     | Carbohydrate metabolism          | Glyoxylate and dicarboxylate metabolism     | ko00630    | 52          |
| Metabolism                     | Overview                         | 2-Oxocarboxylic acid metabolism             | ko01210    | 52          |
| Genetic Information Processing | Translation                      | Ribosome biogenesis in eukaryotes           | ko03008    | 51          |
| Metabolism                     | Amino acid metabolism            | Arginine and proline metabolism             | ko00330    | 49          |
| Genetic Information Processing | Folding, sorting and degradation | RNA degradation                             | ko03018    | 47          |
| Metabolism                     | Energy metabolism                | Methane metabolism                          | ko00680    | 46          |
| Metabolism                     | Overview                         | Fatty acid metabolism                       | ko01212    | 46          |
| Metabolism                     | Amino acid metabolism            | Cysteine and methionine metabolism          | ko00270    | 44          |
| Metabolism                     | Amino acid metabolism            | Phenylalanine metabolism                    | ko00360    | 44          |

|                                      |                                             |                                              |         |    |
|--------------------------------------|---------------------------------------------|----------------------------------------------|---------|----|
| Genetic Information Processing       | Translation                                 | Aminoacyl-tRNA biosynthesis                  | ko00970 | 44 |
| Metabolism                           | Carbohydrate metabolism                     | Pyruvate metabolism                          | ko00620 | 43 |
| Organismal Systems                   | Endocrine system                            | Insulin signaling pathway                    | ko04910 | 43 |
| Cellular Processes                   | Transport and catabolism                    | Phagosome                                    | ko04145 | 42 |
| Metabolism                           | Carbohydrate metabolism                     | Galactose metabolism                         | ko00052 | 40 |
| Metabolism                           | Amino acid metabolism                       | Alanine, aspartate and glutamate metabolism  | ko00250 | 40 |
| Environmental Information Processing | Signal transduction                         | AMPK signaling pathway                       | ko04152 | 40 |
| Metabolism                           | Amino acid metabolism                       | Valine, leucine and isoleucine degradation   | ko00280 | 39 |
| Metabolism                           | Carbohydrate metabolism                     | Fructose and mannose metabolism              | ko00051 | 38 |
| Metabolism                           | Amino acid metabolism                       | Tryptophan metabolism                        | ko00380 | 38 |
| Metabolism                           | Biosynthesis of other secondary metabolites | Phenylpropanoid biosynthesis                 | ko00940 | 38 |
| Genetic Information Processing       | Replication and repair                      | Nucleotide excision repair                   | ko03420 | 38 |
| Cellular Processes                   | Cell growth and death                       | Oocyte meiosis                               | ko04114 | 38 |
| Metabolism                           | Lipid metabolism                            | Glycerophospholipid metabolism               | ko00564 | 37 |
| Genetic Information Processing       | Translation                                 | mRNA surveillance pathway                    | ko03015 | 37 |
| Environmental Information Processing | Signal transduction                         | PI3K-Akt signaling pathway                   | ko04151 | 37 |
| Metabolism                           | Lipid metabolism                            | Glycerolipid metabolism                      | ko00561 | 35 |
| Genetic Information Processing       | Replication and repair                      | DNA replication                              | ko03030 | 35 |
| Metabolism                           | Carbohydrate metabolism                     | Pentose and glucuronate interconversions     | ko00040 | 34 |
| Metabolism                           | Amino acid metabolism                       | Tyrosine metabolism                          | ko00350 | 34 |
| Metabolism                           | Glycan biosynthesis and metabolism          | N-Glycan biosynthesis                        | ko00510 | 34 |
| Metabolism                           | Carbohydrate metabolism                     | Butanoate metabolism                         | ko00650 | 34 |
| Metabolism                           | Energy metabolism                           | Carbon fixation in photosynthetic organisms  | ko00710 | 34 |
| Metabolism                           | Carbohydrate metabolism                     | Citrate cycle (TCA cycle)                    | ko00020 | 33 |
| Metabolism                           | Xenobiotics biodegradation and metabolism   | Metabolism of xenobiotics by cytochrome P450 | ko00980 | 33 |
| Cellular Processes                   | Transport and catabolism                    | Lysosome                                     | ko04142 | 33 |
| Organismal Systems                   | Endocrine system                            | Oxytocin signaling pathway                   | ko04921 | 33 |
| Metabolism                           | Carbohydrate metabolism                     | Pentose phosphate pathway                    | ko00030 | 32 |

|                                      |                                  |                                                     |         |    |
|--------------------------------------|----------------------------------|-----------------------------------------------------|---------|----|
| Metabolism                           | Metabolism of other amino acids  | Glutathione metabolism                              | ko00480 | 32 |
| Environmental Information Processing | Membrane transport               | ABC transporters                                    | ko02010 | 32 |
| Genetic Information Processing       | Folding, sorting and degradation | Proteasome                                          | ko03050 | 32 |
| Metabolism                           | Lipid metabolism                 | Fatty acid degradation                              | ko00071 | 30 |
| Metabolism                           | Metabolism of other amino acids  | beta-Alanine metabolism                             | ko00410 | 30 |
| Cellular Processes                   | Cell motility                    | Regulation of actin cytoskeleton                    | ko04810 | 30 |
| Metabolism                           | Carbohydrate metabolism          | Inositol phosphate metabolism                       | ko00562 | 29 |
| Environmental Information Processing | Signal transduction              | cAMP signaling pathway                              | ko04024 | 29 |
| Environmental Information Processing | Signal transduction              | HIF-1 signaling pathway                             | ko04066 | 29 |
| Genetic Information Processing       | Replication and repair           | Mismatch repair                                     | ko03430 | 28 |
| Environmental Information Processing | Signal transduction              | Ras signaling pathway                               | ko04014 | 28 |
| Organismal Systems                   | Endocrine system                 | Thyroid hormone signaling pathway                   | ko04919 | 28 |
| Metabolism                           | Carbohydrate metabolism          | Propanoate metabolism                               | ko00640 | 27 |
| Environmental Information Processing | Signal transduction              | FoxO signaling pathway                              | ko04068 | 27 |
| Metabolism                           | Amino acid metabolism            | Phenylalanine, tyrosine and tryptophan biosynthesis | ko00400 | 26 |
| Metabolism                           | Lipid metabolism                 | Biosynthesis of unsaturated fatty acids             | ko01040 | 26 |
| Environmental Information Processing | Signal transduction              | MAPK signaling pathway - yeast                      | ko04011 | 25 |
| Environmental Information Processing | Signal transduction              | Rap1 signaling pathway                              | ko04015 | 25 |
| Environmental Information Processing | Signal transduction              | Two-component system                                | ko02020 | 24 |
| Organismal Systems                   | Immune system                    | Chemokine signaling pathway                         | ko04062 | 24 |
| Environmental Information Processing | Signal transduction              | mTOR signaling pathway                              | ko04150 | 24 |
| Cellular Processes                   | Cellular commiunity              | Tight junction                                      | ko04530 | 24 |
| Organismal Systems                   | Nervous system                   | Dopaminergic synapse                                | ko04728 | 24 |
| Metabolism                           | Amino acid metabolism            | Lysine degradation                                  | ko00310 | 23 |
| Organismal Systems                   | Endocrine system                 | PPAR signaling pathway                              | ko03320 | 23 |
| Environmental Information Processing | Signal transduction              | MAPK signaling pathway                              | ko04010 | 23 |

|                                      |                                           |                                             |         |    |
|--------------------------------------|-------------------------------------------|---------------------------------------------|---------|----|
| Environmental Information Processing | Signal transduction                       | Phosphatidylinositol signaling system       | ko04070 | 23 |
| Metabolism                           | Metabolism of other amino acids           | Cyanoamino acid metabolism                  | ko00460 | 22 |
| Genetic Information Processing       | Replication and repair                    | Fanconi anemia pathway                      | ko03460 | 22 |
| Environmental Information Processing | Signal transduction                       | cGMP - PKG signaling pathway                | ko04022 | 22 |
| Cellular Processes                   | Cellular commiunity                       | Focal adhesion                              | ko04510 | 22 |
| Organismal Systems                   | Endocrine system                          | Progesterone-mediated oocyte maturation     | ko04914 | 22 |
| Organismal Systems                   | Digestive system                          | Bile secretion                              | ko04976 | 22 |
| Metabolism                           | Lipid metabolism                          | Fatty acid biosynthesis                     | ko00061 | 21 |
| Metabolism                           | Lipid metabolism                          | Steroid biosynthesis                        | ko00100 | 21 |
| Metabolism                           | Glycan biosynthesis and metabolism        | Various types of N-glycan biosynthesis      | ko00513 | 21 |
| Metabolism                           | Xenobiotics biodegradation and metabolism | Chloroalkane and chloroalkene degradation   | ko00625 | 21 |
| Metabolism                           | Metabolism of cofactors and vitamins      | Pantothenate and CoA biosynthesis           | ko00770 | 21 |
| Genetic Information Processing       | Transcription                             | Basal transcription factors                 | ko03022 | 21 |
| Environmental Information Processing | Signal transduction                       | Wnt signaling pathway                       | ko04310 | 21 |
| Organismal Systems                   | Nervous system                            | Synaptic vesicle cycle                      | ko04721 | 21 |
| Organismal Systems                   | Nervous system                            | Glutamatergic synapse                       | ko04724 | 21 |
| Organismal Systems                   | Excretory system                          | Vasopressin-regulated water reabsorption    | ko04962 | 21 |
| Genetic Information Processing       | Replication and repair                    | Base excision repair                        | ko03410 | 20 |
| Organismal Systems                   | Circulatory system                        | Adrenergic signaling in cardiomyocytes      | ko04261 | 20 |
| Organismal Systems                   | Immune system                             | Fc gamma R-mediated phagocytosis            | ko04666 | 20 |
| Metabolism                           | Amino acid metabolism                     | Valine, leucine and isoleucine biosynthesis | ko00290 | 19 |
| Metabolism                           | Metabolism of cofactors and vitamins      | Porphyrin and chlorophyll metabolism        | ko00860 | 19 |
| Metabolism                           | Energy metabolism                         | Sulfur metabolism                           | ko00920 | 19 |
| Metabolism                           | Xenobiotics biodegradation and metabolism | Drug metabolism - cytochrome P450           | ko00982 | 19 |



|                                      |                                             |                                                        |         |    |
|--------------------------------------|---------------------------------------------|--------------------------------------------------------|---------|----|
| Organismal Systems                   | Nervous system                              | Neurotrophin signaling pathway                         | ko04722 | 19 |
| Organismal Systems                   | Nervous system                              | GABAergic synapse                                      | ko04727 | 19 |
| Organismal Systems                   | Endocrine system                            | GnRH signaling pathway                                 | ko04912 | 19 |
| Organismal Systems                   | Endocrine system                            | Estrogen signaling pathway                             | ko04915 | 19 |
| Metabolism                           | Glycan biosynthesis and metabolism          | Glycosylphosphatidylinositol(GPI)-anchor biosynthesis  | ko00563 | 18 |
| Metabolism                           | Overview                                    | Degradation of aromatic compounds                      | ko01220 | 18 |
| Organismal Systems                   | Immune system                               | T cell receptor signaling pathway                      | ko04660 | 18 |
| Organismal Systems                   | Immune system                               | Leukocyte transendothelial migration                   | ko04670 | 18 |
| Organismal Systems                   | Nervous system                              | Long-term potentiation                                 | ko04720 | 18 |
| Metabolism                           | Energy metabolism                           | Photosynthesis                                         | ko00195 | 17 |
| Metabolism                           | Amino acid metabolism                       | Lysine biosynthesis                                    | ko00300 | 17 |
| Metabolism                           | Lipid metabolism                            | Arachidonic acid metabolism                            | ko00590 | 17 |
| Metabolism                           | Metabolism of cofactors and vitamins        | Nicotinate and nicotinamide metabolism                 | ko00760 | 17 |
| Metabolism                           | Metabolism of cofactors and vitamins        | Retinol metabolism                                     | ko00830 | 17 |
| Metabolism                           | Biosynthesis of other secondary metabolites | Tropane, piperidine and pyridine alkaloid biosynthesis | ko00960 | 17 |
| Genetic Information Processing       | Transcription                               | RNA polymerase                                         | ko03020 | 17 |
| Organismal Systems                   | Development                                 | Axon guidance                                          | ko04360 | 17 |
| Environmental Information Processing | Signal transduction                         | Hippo signaling pathway                                | ko04390 | 17 |
| Cellular Processes                   | Cellular community                          | Gap junction                                           | ko04540 | 17 |
| Organismal Systems                   | Nervous system                              | Serotonergic synapse                                   | ko04726 | 17 |
| Genetic Information Processing       | Replication and repair                      | Homologous recombination                               | ko03440 | 16 |
| Environmental Information Processing | Signal transduction                         | ErbB signaling pathway                                 | ko04012 | 16 |
| Organismal Systems                   | Immune system                               | Platelet activation                                    | ko04611 | 16 |
| Organismal Systems                   | Nervous system                              | Retrograde endocannabinoid signaling                   | ko04723 | 16 |
| Organismal Systems                   | Endocrine system                            | Melanogenesis                                          | ko04916 | 16 |
| Metabolism                           | Carbohydrate metabolism                     | Ascorbate and aldarate metabolism                      | ko00053 | 15 |
| Metabolism                           | Metabolism of cofactors and vitamins        | One carbon pool by folate                              | ko00670 | 15 |
| Metabolism                           | Metabolism of cofactors and vitamins        | Biotin metabolism                                      | ko00780 | 15 |

|                                      |                                             |                                                           |         |    |
|--------------------------------------|---------------------------------------------|-----------------------------------------------------------|---------|----|
| Metabolism                           | Metabolism of cofactors and vitamins        | Folate biosynthesis                                       | ko00790 | 15 |
| Metabolism                           | Biosynthesis of other secondary metabolites | Isoquinoline alkaloid biosynthesis                        | ko00950 | 15 |
| Organismal Systems                   | Nervous system                              | Cholinergic synapse                                       | ko04725 | 15 |
| Organismal Systems                   | Endocrine system                            | Adipocytokine signaling pathway                           | ko04920 | 15 |
| Metabolism                           | Metabolism of cofactors and vitamins        | Ubiquinone and other terpenoid-quinone biosynthesis       | ko00130 | 14 |
| Metabolism                           | Lipid metabolism                            | alpha-Linolenic acid metabolism                           | ko00592 | 14 |
| Metabolism                           | Lipid metabolism                            | Sphingolipid metabolism                                   | ko00600 | 14 |
| Metabolism                           | Energy metabolism                           | Carbon fixation pathways in prokaryotes                   | ko00720 | 14 |
| Metabolism                           | Metabolism of terpenoids and polyketides    | Terpenoid backbone biosynthesis                           | ko00900 | 14 |
| Metabolism                           | Energy metabolism                           | Nitrogen metabolism                                       | ko00910 | 14 |
| Environmental Information Processing | Signal transduction                         | Calcium signaling pathway                                 | ko04020 | 14 |
| Organismal Systems                   | Circulatory system                          | Vascular smooth muscle contraction                        | ko04270 | 14 |
| Environmental Information Processing | Signal transduction                         | VEGF signaling pathway                                    | ko04370 | 14 |
| Cellular Processes                   | Cellular commiunity                         | Adherens junction                                         | ko04520 | 14 |
| Organismal Systems                   | Excretory system                            | Endocrine and other factor-regulated calcium reabsorption | ko04961 | 14 |
| Metabolism                           | Amino acid metabolism                       | Histidine metabolism                                      | ko00340 | 13 |
| Metabolism                           | Lipid metabolism                            | Ether lipid metabolism                                    | ko00565 | 13 |
| Metabolism                           | Xenobiotics biodegradation and metabolism   | Aminobenzoate degradation                                 | ko00627 | 13 |
| Cellular Processes                   | Cell growth and death                       | p53 signaling pathway                                     | ko04115 | 13 |
| Cellular Processes                   | Transport and catabolism                    | Regulation of autophagy                                   | ko04140 | 13 |
| Organismal Systems                   | Immune system                               | Antigen processing and presentation                       | ko04612 | 13 |
| Organismal Systems                   | Immune system                               | Natural killer cell mediated cytotoxicity                 | ko04650 | 13 |
| Organismal Systems                   | Nervous system                              | Long-term depression                                      | ko04730 | 13 |
| Organismal Systems                   | Endocrine system                            | Thyroid hormone synthesis                                 | ko04918 | 13 |
| Organismal Systems                   | Digestive system                            | Pancreatic secretion                                      | ko04972 | 13 |
| Metabolism                           | Glycan biosynthesis and metabolism          | Other glycan degradation                                  | ko00511 | 12 |

|                                      |                                             |                                                  |         |    |
|--------------------------------------|---------------------------------------------|--------------------------------------------------|---------|----|
|                                      | Xenobiotics                                 |                                                  |         |    |
| Metabolism                           | biodegradation and metabolism               | Styrene degradation                              | ko00643 | 12 |
| Organismal Systems                   | Circulatory system                          | Cardiac muscle contraction                       | ko04260 | 12 |
| Organismal Systems                   | Environmental adaptation                    | Plant-pathogen interaction                       | ko04626 | 12 |
| Organismal Systems                   | Environmental adaptation                    | Circadian entrainment                            | ko04713 | 12 |
| Organismal Systems                   | Sensory system                              | Inflammatory mediator regulation of TRP channels | ko04750 | 11 |
| Organismal Systems                   | Excretory system                            | Collecting duct acid secretion                   | ko04966 | 11 |
| Organismal Systems                   | Digestive system                            | Gastric acid secretion                           | ko04971 | 11 |
| Metabolism                           | Energy metabolism                           | Photosynthesis - antenna proteins                | ko00196 | 10 |
|                                      | Xenobiotics                                 |                                                  |         |    |
| Metabolism                           | biodegradation and metabolism               | Drug metabolism - other enzymes                  | ko00983 | 10 |
| Genetic Information Processing       | Folding, sorting and degradation            | Protein export                                   | ko03060 | 10 |
| Environmental Information Processing | Signal transduction                         | TGF-beta signaling pathway                       | ko04350 | 10 |
| Environmental Information Processing | Signal transduction                         | Hippo signaling pathway -fly                     | ko04391 | 10 |
| Organismal Systems                   | Immune system                               | B cell receptor signaling pathway                | ko04662 | 10 |
| Organismal Systems                   | Environmental adaptation                    | Circadian rhythm                                 | ko04710 | 10 |
| Metabolism                           | Lipid metabolism                            | Fatty acid elongation                            | ko00062 | 9  |
|                                      | Xenobiotics                                 |                                                  |         |    |
| Metabolism                           | biodegradation and metabolism               | Benzoate degradation                             | ko00362 | 9  |
| Metabolism                           | Metabolism of other amino acids             | Taurine and hypotaurine metabolism               | ko00430 | 9  |
| Metabolism                           | Metabolism of other amino acids             | Selenocompound metabolism                        | ko00450 | 9  |
| Metabolism                           | Lipid metabolism                            | Linoleic acid metabolism                         | ko00591 | 9  |
|                                      | Xenobiotics                                 |                                                  |         |    |
| Metabolism                           | biodegradation and metabolism               | Naphthalene degradation                          | ko00626 | 9  |
| Genetic Information Processing       | Folding, sorting and degradation            | Sulfur relay system                              | ko04122 | 9  |
| Organismal Systems                   | Immune system                               | Cytosolic DNA-sensing pathway                    | ko04623 | 9  |
| Metabolism                           | Metabolism of other amino acids             | Phosphonate and phosphinate metabolism           | ko00440 | 8  |
| Metabolism                           | Biosynthesis of other secondary metabolites | Streptomycin biosynthesis                        | ko00521 | 8  |

|                                      |                                      |                                            |         |   |
|--------------------------------------|--------------------------------------|--------------------------------------------|---------|---|
| Metabolism                           | Metabolism of cofactors and vitamins | Riboflavin metabolism                      | ko00740 | 8 |
|                                      | Xenobiotics                          |                                            |         |   |
| Metabolism                           | biodegradation and metabolism        | Caprolactam degradation                    | ko00930 | 8 |
| Cellular Processes                   | Cell growth and death                | Apoptosis                                  | ko04210 | 8 |
| Environmental Information Processing | Signal transduction                  | Hedgehog signaling pathway                 | ko04340 | 8 |
| Organismal Systems                   | Immune system                        | Fc epsilon RI signaling pathway            | ko04664 | 8 |
| Organismal Systems                   | Endocrine system                     | Insulin secretion                          | ko04911 | 8 |
| Organismal Systems                   | Endocrine system                     | Prolactin signaling pathway                | ko04917 | 8 |
| Organismal Systems                   | Digestive system                     | Salivary secretion                         | ko04970 | 8 |
|                                      | Xenobiotics                          |                                            |         |   |
| Metabolism                           | biodegradation and metabolism        | Bisphenol degradation                      | ko00363 | 7 |
|                                      | Metabolism of cofactors and vitamins |                                            |         |   |
| Metabolism                           | Metabolism of cofactors and vitamins | Thiamine metabolism                        | ko00730 | 7 |
| Genetic Information Processing       | Folding, sorting and degradation     | SNARE interactions in vesicular transport  | ko04130 | 7 |
| Organismal Systems                   | Development                          | Osteoclast differentiation                 | ko04380 | 7 |
| Organismal Systems                   | Immune system                        | RIG-I-like receptor signaling pathway      | ko04622 | 7 |
| Organismal Systems                   | Sensory system                       | Phototransduction - fly                    | ko04745 | 7 |
| Organismal Systems                   | Excretory system                     | Aldosterone-regulated sodium reabsorption  | ko04960 | 7 |
| Organismal Systems                   | Digestive system                     | Carbohydrate digestion and absorption      | ko04973 | 7 |
|                                      | Carbohydrate metabolism              |                                            |         |   |
| Metabolism                           | Carbohydrate metabolism              | C5-Branched dibasic acid metabolism        | ko00660 | 6 |
|                                      | Metabolism of cofactors and vitamins |                                            |         |   |
| Metabolism                           | Metabolism of cofactors and vitamins | Vitamin B6 metabolism                      | ko00750 | 6 |
| Environmental Information Processing | Signal transduction                  | MAPK signaling pathway - fly               | ko04013 | 6 |
| Organismal Systems                   | Endocrine system                     | Renin-angiotensin system                   | ko04614 | 6 |
| Metabolism                           | Lipid metabolism                     | Synthesis and degradation of ketone bodies | ko00072 | 5 |
| Metabolism                           | Lipid metabolism                     | Primary bile acid biosynthesis             | ko00120 | 5 |
| Metabolism                           | Lipid metabolism                     | Steroid hormone biosynthesis               | ko00140 | 5 |
| Metabolism                           | Glycan biosynthesis and metabolism   | Other types of O-glycan biosynthesis       | ko00514 | 5 |
| Environmental Information Processing | Signal transduction                  | NF-kappa B signaling pathway               | ko04064 | 5 |
| Organismal Systems                   | Development                          | Dorso-ventral axis formation               | ko04320 | 5 |

|                                      |                                             |                                                 |         |   |
|--------------------------------------|---------------------------------------------|-------------------------------------------------|---------|---|
| Organismal Systems                   | Immune system                               | NOD-like receptor signaling pathway             | ko04621 | 5 |
| Environmental Information Processing | Signal transduction                         | TNF signaling pathway                           | ko04668 | 5 |
| Organismal Systems                   | Sensory system                              | Olfactory transduction                          | ko04740 | 5 |
| Organismal Systems                   | Excretory system                            | Proximal tubule bicarbonate reclamation         | ko04964 | 5 |
| Organismal Systems                   | Digestive system                            | Protein digestion and absorption                | ko04974 | 5 |
| Organismal Systems                   | Digestive system                            | Fat digestion and absorption                    | ko04975 | 5 |
| Metabolism                           | Biosynthesis of other secondary metabolites | Butirosin and neomycin biosynthesis             | ko00524 | 4 |
| Metabolism                           | Metabolism of terpenoids and polyketides    | Limonene and pinene degradation                 | ko00903 | 4 |
| Genetic Information Processing       | Replication and repair                      | Non-homologous end-joining                      | ko03450 | 4 |
| Environmental Information Processing | Signal transduction                         | Notch signaling pathway                         | ko04330 | 4 |
| Organismal Systems                   | Immune system                               | Toll-like receptor signaling pathway            | ko04620 | 4 |
| Metabolism                           | Biosynthesis of other secondary metabolites | Novobiocin biosynthesis                         | ko00401 | 3 |
| Metabolism                           | Glycan biosynthesis and metabolism          | Glycosaminoglycan degradation                   | ko00531 | 3 |
| Metabolism                           | Glycan biosynthesis and metabolism          | Glycosphingolipid biosynthesis - ganglio series | ko00604 | 3 |
| Metabolism                           | Metabolism of terpenoids and polyketides    | Biosynthesis of ansamycins                      | ko01051 | 3 |
| Environmental Information Processing | Signal transduction                         | Plant hormone signal transduction               | ko04075 | 3 |
| Cellular Processes                   | Cell growth and death                       | Cell cycle - Caulobacter                        | ko04112 | 3 |
| Organismal Systems                   | Environmental adaptation                    | Circadian rhythm - plant                        | ko04712 | 3 |
| Organismal Systems                   | Sensory system                              | Taste transduction                              | ko04742 | 3 |
| Organismal Systems                   | Sensory system                              | Phototransduction                               | ko04744 | 3 |
| Organismal Systems                   | Endocrine system                            | Ovarian Steroidogenesis                         | ko04913 | 3 |
| Organismal Systems                   | Digestive system                            | Vitamin digestion and absorption                | ko04977 | 3 |
| Metabolism                           | Biosynthesis of other secondary metabolites | Caffeine metabolism                             | ko00232 | 2 |
| Metabolism                           | Metabolism of other amino acids             | D-Glutamine and D-glutamate metabolism          | ko00471 | 2 |
| Metabolism                           | Glycan biosynthesis and metabolism          | Peptidoglycan biosynthesis                      | ko00550 | 2 |

|                    |                                             |                                                       |         |   |
|--------------------|---------------------------------------------|-------------------------------------------------------|---------|---|
| Metabolism         | Glycan biosynthesis and metabolism          | Glycosphingolipid biosynthesis - globo series         | ko00603 | 2 |
| Metabolism         | Metabolism of cofactors and vitamins        | Lipoic acid metabolism                                | ko00785 | 2 |
| Metabolism         | Metabolism of terpenoids and polyketides    | Sesquiterpenoid and triterpenoid biosynthesis         | ko00909 | 2 |
| Metabolism         | Biosynthesis of other secondary metabolites | Flavonoid biosynthesis                                | ko00941 | 2 |
| Metabolism         | Biosynthesis of other secondary metabolites | Stilbenoid, diarylheptanoid and gingerol biosynthesis | ko00945 | 2 |
| Metabolism         | Biosynthesis of other secondary metabolites | Betalain biosynthesis                                 | ko00965 | 2 |
| Metabolism         | Metabolism of terpenoids and polyketides    | Nonribosomal peptide structures                       | ko01054 | 2 |
| Organismal Systems | Digestive system                            | Mineral absorption                                    | ko04978 | 2 |
| Metabolism         | Biosynthesis of other secondary metabolites | Aflatoxin biosynthesis                                | ko00254 | 1 |
| Metabolism         | Metabolism of terpenoids and polyketides    | Geraniol degradation                                  | ko00281 | 1 |
| Metabolism         | Xenobiotics biodegradation and metabolism   | Chlorocyclohexane and chlorobenzene degradation       | ko00361 | 1 |
| Metabolism         | Xenobiotics biodegradation and metabolism   | Fluorobenzoate degradation                            | ko00364 | 1 |
| Metabolism         | Metabolism of terpenoids and polyketides    | Polyketide sugar unit biosynthesis                    | ko00523 | 1 |
| Metabolism         | Xenobiotics biodegradation and metabolism   | Toluene degradation                                   | ko00623 | 1 |
| Metabolism         | Biosynthesis of other secondary metabolites | Indole alkaloid biosynthesis                          | ko00901 | 1 |
| Metabolism         | Metabolism of terpenoids and polyketides    | Brassinosteroid biosynthesis                          | ko00905 | 1 |
| Metabolism         | Metabolism of terpenoids and polyketides    | Carotenoid biosynthesis                               | ko00906 | 1 |
| Metabolism         | Metabolism of terpenoids and polyketides    | Zeatin biosynthesis                                   | ko00908 | 1 |
| Metabolism         | Biosynthesis of other secondary metabolites | Isoflavonoid biosynthesis                             | ko00943 | 1 |
| Metabolism         | Biosynthesis of other secondary metabolites | Flavone and flavonol biosynthesis                     | ko00944 | 1 |
| Metabolism         | Biosynthesis of other secondary metabolites | Glucosinolate biosynthesis                            | ko00966 | 1 |

|                                      |                                          |                                              |         |   |
|--------------------------------------|------------------------------------------|----------------------------------------------|---------|---|
| Metabolism                           | Metabolism of terpenoids and polyketides | Insect hormone biosynthesis                  | ko00981 | 1 |
| Metabolism                           | Metabolism of terpenoids and polyketides | Biosynthesis of vancomycin group antibiotics | ko01055 | 1 |
| Environmental Information Processing | Membrane transport                       | Bacterial secretion system                   | ko03070 | 1 |
| Environmental Information Processing | Signaling molecules and interaction      | Neuroactive ligand-receptor interaction      | ko04080 | 1 |
| Environmental Information Processing | Signal transduction                      | Jak-STAT signaling pathway                   | ko04630 | 1 |
| Organismal Systems                   | Environmental adaptation                 | Circadian rhythm - fly                       | ko04711 | 1 |

**Table S4.** Enzymes and related unigenes in the potential fungal taxol biosynthesis pathway of *C. cladosporioides* MD2.

| Abbreviation of enzymes | Enzymes                                     |               | Number | Unigene IDs                                                                                                                                                                             |
|-------------------------|---------------------------------------------|---------------|--------|-----------------------------------------------------------------------------------------------------------------------------------------------------------------------------------------|
| AACT                    | acetyl-CoA C-acetyltransferase              | EC:2.3.1.9    | 2      | c12899_g1,c8934_g1                                                                                                                                                                      |
| HMGS                    | hydroxymethylglutaryl-CoA synthase          | EC:2.3.3.10   | 1      | c13511_g1                                                                                                                                                                               |
| HMGR                    | hydroxymethylglutaryl-CoA reductase (NADPH) | EC:1.1.1.34   | 1      | c14615_g1                                                                                                                                                                               |
| MK                      | mevalonate kinase                           | EC:2.7.1.36   | 1      | c12988_g1                                                                                                                                                                               |
| MDD                     | diphosphomevalonate decarboxylase           | EC:4.1.1.33   | 1      | c10355_g1                                                                                                                                                                               |
| IPI                     | isopentenyl-diphosphate Delta-isomerase     | EC:5.3.3.2    | 1      | c11713_g1                                                                                                                                                                               |
| FDPS                    | farnesyl diphosphate synthase               | EC:2.5.1.1    | 1      | c10023_g1                                                                                                                                                                               |
| GGPPs                   | geranylgeranyl diphosphate synthase         | EC:2.5.1.29   | 1      | c1886_g1                                                                                                                                                                                |
| TS                      | taxadiene synthase                          | EC:4.2.3.17   | 1      | c11040_g1                                                                                                                                                                               |
|                         |                                             |               |        | c9962_g1, c12628_g1, c2186_g1, c8872_g1, c6331_g1, c2364_g1, c11767_g1, c6828_g1, c5652_g1, c6036_g1, c15016_g1, c1021_g1, c13571_g1, c1481_g1, c4632_g3, c4707_g1, c5994_g1, c5767_g1, |
| T5αH                    | taxadiene 5-alpha-hydroxylase               | EC:1.14.99.37 | 21     | c5237_g1, c3501_g1, c240_g1, c2078_g1, c2045_g1, c11556_g1, c15030_g1,                                                                                                                  |
| T13αH                   | taxane 13-alpha-hydroxylase                 | EC:1.14.13.77 | 17     | c4799_g1, c4952_g1,                                                                                                                                                                     |

c3717\_g1, c14211\_g1 , c22\_g1,  
c10076\_g1, c14298\_g1,  
c3976\_g1, c13288\_g1,  
c11506\_g1, c6963\_g1,  
c8724\_g1, c5859\_g1

|     |                                                  |              |   |          |
|-----|--------------------------------------------------|--------------|---|----------|
| TBT | 2-alpha-hydroxytaxane 2-O-<br>benzoyltransferase | EC:2.3.1.166 | 1 | c5600_g1 |
|-----|--------------------------------------------------|--------------|---|----------|

---
